# Supplementary material for: Interleukin-6 and thyroid-stimulating hormone index predict plaque stability in carotid artery stenosis: analyses by lasso-logistic regression
Source: PubMed Central journal article supplement (PMC11663930; doi:10.3389/fcvm.2024.1484273), 2024-12-09
Supplement: Image1.pdf [file Image1.pdf]

## Supplementary Figures

### Supplementary Figure 1: Histological images and plaque vulnerability scores

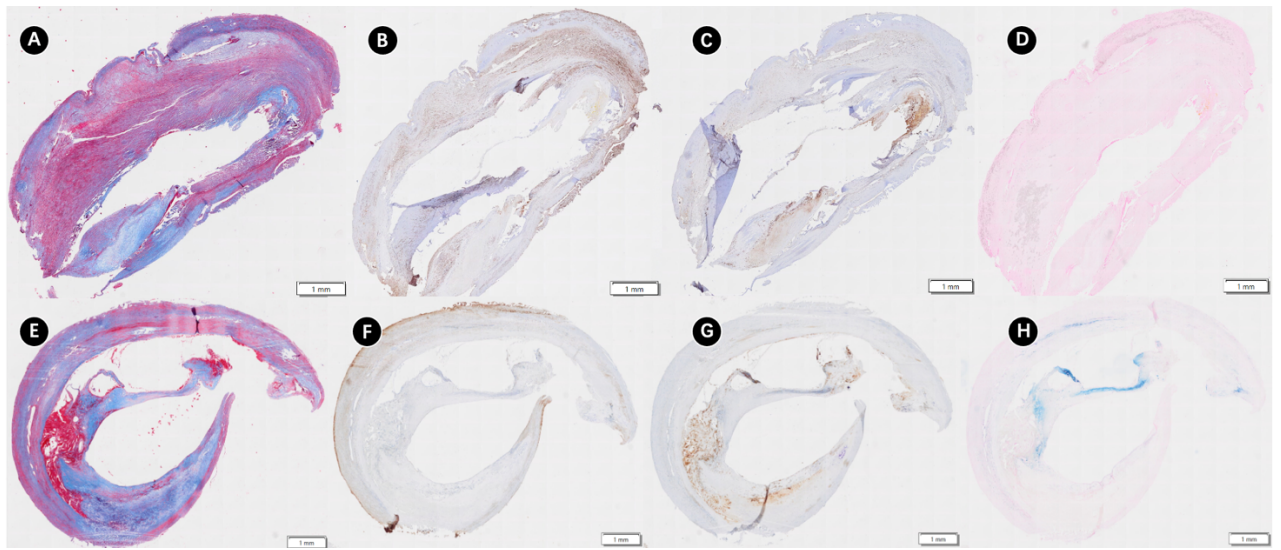

Note: The scale bars in all immunohistochemical images represent 1 mm.

A vulnerable plaque (**A–D**), with a total score of 4 points.

**(A)** Masson staining shows a low collagen fiber content within the plaque (score: 1).

**(B)**  $\alpha$ -SMA immunohistochemistry shows a low content of contractile smooth muscle cells within the plaque (score: 1).

**(C)** CD68 immunohistochemistry shows significant macrophage infiltration within the plaque (score: 1).

**(D)** Prussian blue staining shows evidence of hemorrhage within the plaque (score: 1).

A stable plaque (**E–H**), with a total score of 1 point.

**(E)** Masson staining shows a high collagen fiber content within the plaque (score: 0).

**(F)**  $\alpha$ -SMA immunohistochemistry shows a low content of contractile smooth muscle cells within the plaque (score: 1).

**(G)** CD68 immunohistochemistry shows minimal macrophage infiltration within the plaque (score: 0).

**(H)** Prussian blue staining shows no evidence of hemorrhage within the plaque (score: 0).

### Supplementary Figure 2: ROC curves of different prediction models

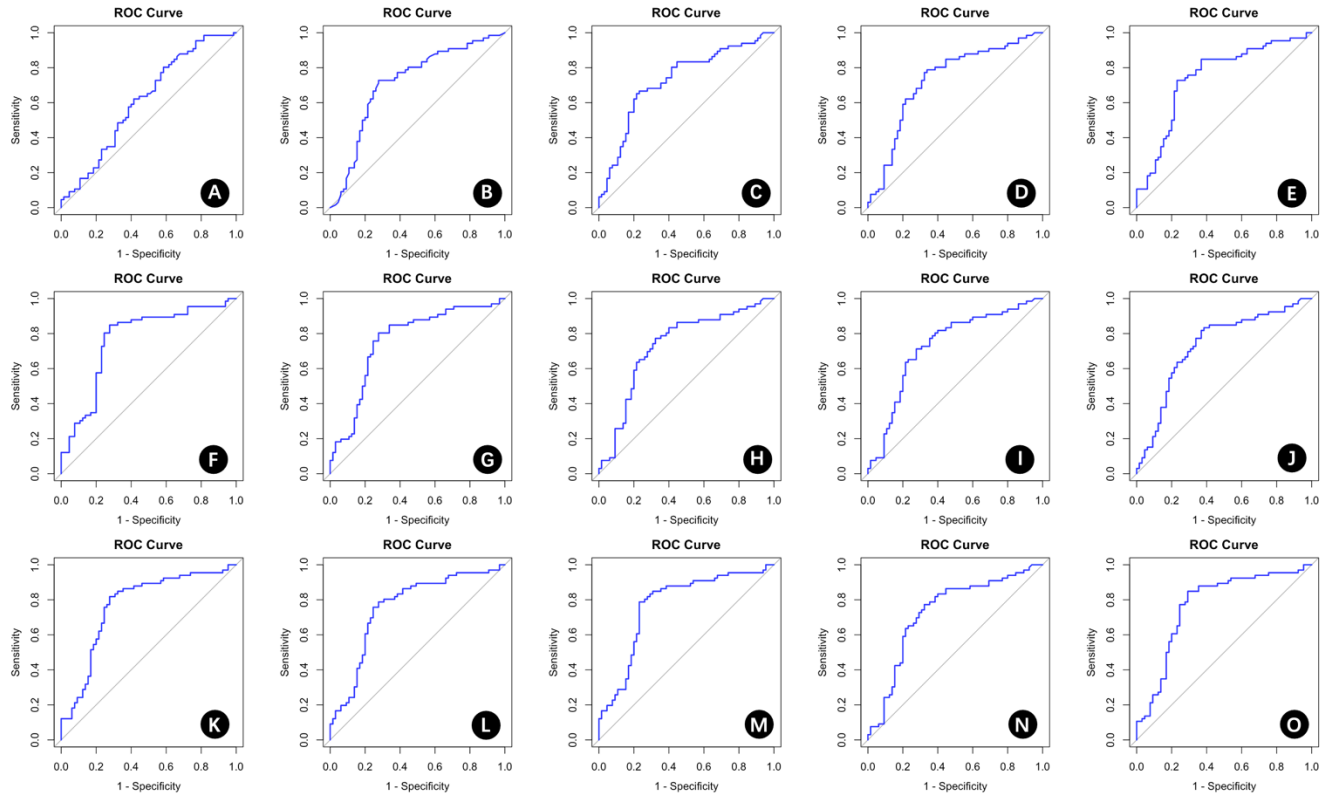

Note: ROC curves (A–O) represent the predictive performance for Models 1–15, respectively. Each panel (A–O) corresponds to one model, with sensitivity on the y-axis and 1-specificity on the x-axis.
