# Supplementary material for: Interleukin-6 and thyroid-stimulating hormone index predict plaque stability in carotid artery stenosis: analyses by lasso-logistic regression
Source: PubMed Central journal article supplement (PMC11663930; doi:10.3389/fcvm.2024.1484273), 2024-12-09
Supplement: Table1.pdf [file Table1.pdf]

## Supplementary Tables

**Supplementary Table 1: List of abbreviations**

| Abbreviations | Full description                      |
|---------------|---------------------------------------|
| AIC           | Akaike information criterion          |
| Alb           | Albumin                               |
| Apo AI        | Apolipoprotein AI                     |
| Apo B         | Apolipoprotein B                      |
| AUC           | Area Under the Curve                  |
| BIC           | Bayesian information criterion        |
| BMI           | Body Mass Index                       |
| CIMT          | intima-media thickness                |
| CRP           | C-Reactive Protein                    |
| Glu           | Glucose                               |
| Hb            | Hemoglobin                            |
| HDL           | High-Density Lipoprotein Cholesterol  |
| IL-6          | Interleukin-6                         |
| LDL           | Low-Density Lipoprotein Cholesterol   |
| PCT           | Procalcitonin                         |
| ROC           | Receiver Operating Characteristic     |
| TC            | Total Cholesterol                     |
| TFQI          | Thyroid Feedback Quantile-based Index |
| TG            | Triglycerides                         |
| TSH           | Thyroid-Stimulating Hormone           |
| TSHI          | Thyroid-Stimulating Hormone Index     |
| TT4RI         | Thyrotroph T4 Resistance Index        |

**Supplementary Table 2: Calculation of Thyroid Sensitivity Indices**

|       |                                       |                                  |
|-------|---------------------------------------|----------------------------------|
| TSHI  | TSH index                             | $TSHI = \ln TSH + 0.1345 * FT4$  |
| TT4RI | Thyrotroph T4 Resistance Index        | $TT4RI = FT4 * TSH$              |
| TFQI  | Thyroid Feedback Quantile-based Index | $TFQI = cdf FT4 - (1 - cdf TSH)$ |

Note: cdf represents the cumulative distribution function.

**Supplementary Table 3: Vulnerable Plaque Score Data Sheet for Both Groups of Patients**

| Total Scores                         | Total Cases (n=131) |
|--------------------------------------|---------------------|
| 0                                    | 11                  |
| 1                                    | 21                  |
| 2                                    | 33                  |
| 3                                    | 37                  |
| 4                                    | 29                  |
| Stable plaques<br>(Scores $\leq 2$ ) | 65                  |

**Supplementary Table 4: Results of covariance diagnosis**

| Features        | Variance Inflation<br>Factor (VIF) | Tolerance   |
|-----------------|------------------------------------|-------------|
| Gender          | 1.63                               | 0.61        |
| Age             | 1.63                               | 0.61        |
| BMI             | 1.96                               | 0.51        |
| Smoking history | 1.94                               | 0.52        |
| Alcohol history | 2.04                               | 0.49        |
| Hypertension    | 1.48                               | 0.67        |
| Type 2 diabetes | 1.84                               | 0.54        |
| Stroke          | 1.33                               | 0.75        |
| Alb             | 1.64                               | 0.61        |
| Glu             | 1.54                               | 0.65        |
| TG              | 8.63                               | 0.12        |
| <b>TC</b>       | <b>128.05</b>                      | <b>0.01</b> |
| <b>HDL</b>      | <b>12.11</b>                       | <b>0.08</b> |
| <b>LDL</b>      | <b>107.77</b>                      | <b>0.01</b> |
| Apo AI          | 4.24                               | 0.24        |
| <b>Apo B</b>    | <b>27.70</b>                       | <b>0.04</b> |
| CRP             | 1.49                               | 0.67        |
| Hb              | 1.83                               | 0.55        |
| PCT             | 1.62                               | 0.62        |
| IL-6            | 2.59                               | 0.39        |
| D-dimer         | 1.60                               | 0.63        |
| <b>TSH</b>      | <b>67.68</b>                       | <b>0.01</b> |
| FT3             | 2.00                               | 0.50        |
| <b>FT4</b>      | <b>30.17</b>                       | <b>0.03</b> |
| <b>TSHI</b>     | <b>20.08</b>                       | <b>0.05</b> |
| <b>TT4RI</b>    | <b>59.99</b>                       | <b>0.02</b> |
| <b>TFQI</b>     | <b>41.24</b>                       | <b>0.02</b> |

**Supplementary Table 5: Performance of different models based on Lasso-logistic regression**

| Model                  | AUC         | P               | 95%CI            | Threshold   | Accuracy    | Sensitivity | Specificity |
|------------------------|-------------|-----------------|------------------|-------------|-------------|-------------|-------------|
| Model1:IL6             | 0.61        | 0.026           | 0.52-0.71        | 0.45        | 0.61        | 0.80        | 0.42        |
| Model2:TSH             | 0.72        | <.001           | 0.62-0.81        | 0.47        | 0.73        | 0.73        | 0.72        |
| Model3:TSHI            | 0.73        | <.001           | 0.64-0.82        | 0.54        | 0.72        | 0.65        | 0.78        |
| Model4:TT4RI           | 0.73        | <.001           | 0.64-0.82        | 0.45        | 0.73        | 0.77        | 0.68        |
| Model5:IL6+TSH         | 0.74        | <.001           | 0.66-0.83        | 0.48        | 0.75        | 0.73        | 0.77        |
| <b>Model6:IL6+TSHI</b> | <b>0.77</b> | <b>&lt;.001</b> | <b>0.68-0.85</b> | <b>0.46</b> | <b>0.79</b> | <b>0.85</b> | <b>0.72</b> |
| Model7:IL6+TT4RI       | 0.76        | <.001           | 0.67-0.84        | 0.42        | 0.76        | 0.80        | 0.72        |

---

|                             |      |       |           |      |      |      |      |
|-----------------------------|------|-------|-----------|------|------|------|------|
| Model8:TSH+TSHI             | 0.73 | <.001 | 0.64-0.82 | 0.47 | 0.73 | 0.77 | 0.68 |
| Model9: TSH+TT4RI           | 0.73 | <.001 | 0.64-0.82 | 0.47 | 0.72 | 0.71 | 0.72 |
| Model10: TSHI+TT4RI         | 0.73 | <.001 | 0.64-0.82 | 0.43 | 0.73 | 0.82 | 0.63 |
| Model11: IL6+TSH+TSHI       | 0.77 | <.001 | 0.68-0.85 | 0.45 | 0.77 | 0.82 | 0.72 |
| Model12: IL6+TSH+TT4RI      | 0.76 | <.001 | 0.67-0.84 | 0.47 | 0.76 | 0.76 | 0.75 |
| Model13: IL6+TSHI+TT4RI     | 0.77 | <.001 | 0.69-0.85 | 0.46 | 0.78 | 0.79 | 0.77 |
| Model14: TSH+TSHI+TT4RI     | 0.73 | <.001 | 0.64-0.82 | 0.47 | 0.73 | 0.77 | 0.68 |
| Model15: IL6+TSH+TSHI+TT4RI | 0.77 | <.001 | 0.69-0.85 | 0.45 | 0.78 | 0.85 | 0.71 |

---
